# Supplementary material for: Alteration in the Synaptic and Extrasynaptic Organization of AMPA Receptors in the Hippocampus of P301S Tau Transgenic Mice
Source: MDPI journal article supplement (doi:10.3390/ijms232113527), 2022-11-04
Supplement: s1 [file s1]

## Supplementary Information

### Alteration in the synaptic and extrasynaptic organization of AMPA receptors in the hippocampus of P301S tau transgenic mice

Rocio Alfaro-Ruiz<sup>1</sup>, Carolina Aguado<sup>1</sup>, Alejandro Martín-Belmonte<sup>1,2,3</sup>, Ana Esther Moreno-Martínez<sup>1</sup>, Jesús Merchán-Rubira<sup>5</sup>, Félix Hernández<sup>4,5</sup>, Jesús Ávila<sup>4,5</sup>, Yugo Fukazawa<sup>6</sup> and Rafael Luján<sup>1</sup>

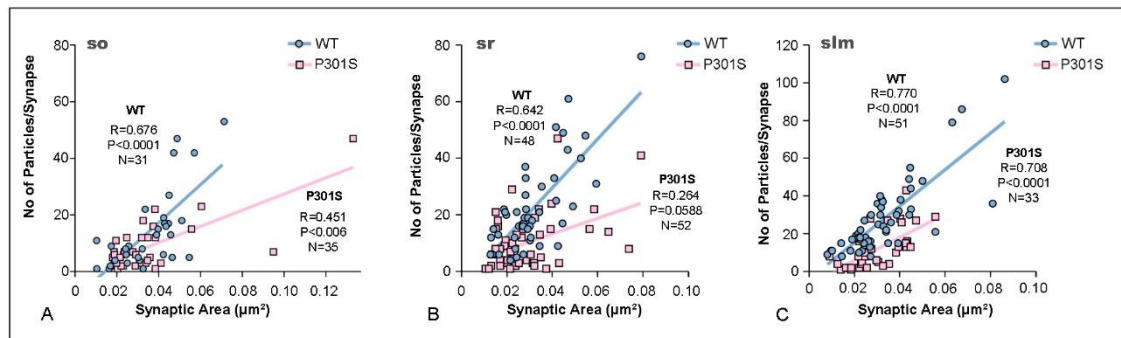

**Supplementary Figure S1. *GluA1-4* immunoparticle density at excitatory synapses**

**on spines.** Correlation of the number of GluA1-4 immunoparticles and IMP-cluster area on pyramidal cell spines. (A-C) Scatter plots showing the correlation between surface areas of postsynaptic membrane specializations and numbers of gold particles labelling GluA1-4 receptors in the three dendritic layers in both wild type and P301S mice. A positive linear correlation between immunoparticle number and synaptic size was detected throughout the CA1 field (Spearman's rank-order correlation).

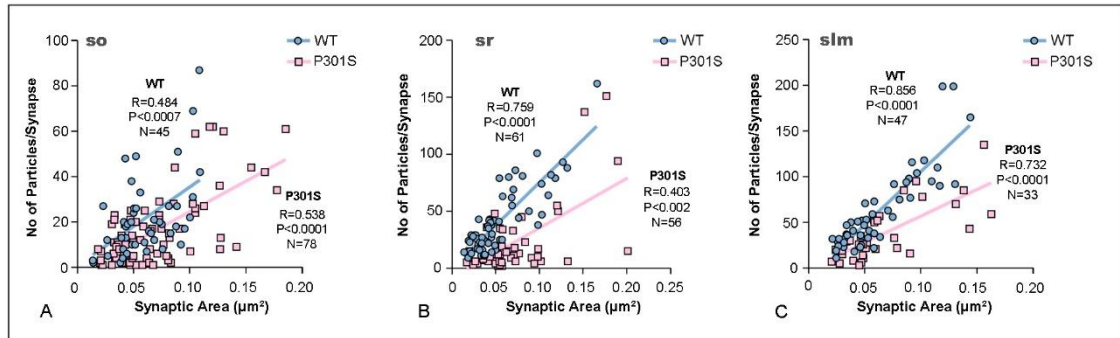

**Supplementary Figure S2. *GluA1-4* immunoparticle density at excitatory synapses on interneurons.** Correlation of the number of GluA1-4 immunoparticles and IMP-cluster area on interneuron dendrites. (A-C) Scatter plots showing the correlation between surface areas of postsynaptic membrane specializations and numbers of gold particles labelling GluA1-4 receptors in the three dendritic layers in both wild type and P301S mice. In the three dendritic layers there is a positive linear correlation between immunoparticle number and synaptic size (Spearman's rank-order correlation).
